# Supplementary material for: 15d-PGJ2-loaded nanocapsules ameliorate experimental gout arthritis by reducing pain and inflammation in a PPAR-gamma-sensitive manner in mice
Source: PubMed Central journal article supplement (PMC6143605; doi:10.1038/s41598-018-32334-0), 2018-09-18
Supplement: 41598_2018_32334_MOESM1_ESM.pdf [file 41598_2018_32334_MOESM1_ESM.pdf]

## Supplementary Information

### **15d-PGJ<sub>2</sub>-loaded nanocapsules ameliorate experimental gout arthritis by reducing pain and inflammation in a PPAR-gamma-sensitive manner in mice**

Kenji W. Ruiz-Miyazawa<sup>a</sup>, Larissa Staurengo-Ferrari<sup>a</sup>, Felipe A. Pinho-Ribeiro<sup>a</sup>, Victor Fattori<sup>a</sup>, Tiago H. Zaninelli<sup>a</sup>, Stephanie Badaro-Garcia<sup>a</sup>, Sergio M. Borghi<sup>a</sup>, Ketlem C. Andrade<sup>a</sup>, Juliana T. Clemente-Napimoga<sup>b</sup>, Jose C. Alves-Filho<sup>c</sup>, Thiago M. Cunha<sup>c</sup>, Leonardo F. Fraceto<sup>d</sup>, Fernando Q. Cunha<sup>c</sup>, Marcelo H. Napimoga<sup>b</sup>, Rubia Casagrande<sup>e</sup>, and Waldiceu A. Verri, Jr.<sup>a,\*</sup>

<sup>a</sup>Departamento de Ciências Patológicas, Universidade Estadual de Londrina-UEL, Rod. Celso Garcia Cid, Km 380, PR445, 86057-970, Cx. Postal 10.011, Londrina, Paraná, Brazil.

<sup>b</sup>Laboratory of Immunology and Molecular Biology, São Leopoldo Mandic Institute and Researcher Center, Campinas, Brazil

<sup>c</sup>Department of Pharmacology, Ribeirão Preto Medical School, University of São Paulo, Avenida Bandeirantes s/n, 14050-490, Ribeirão Preto, São Paulo, Brazil

<sup>d</sup>Department of Environmental Engineering, São Paulo State University, Sorocaba, Brazil

<sup>e</sup>Departamento de Ciências Farmacêuticas, Universidade Estadual de Londrina-UEL, Avenida Robert Koch, 60, Hospital Universitário, 86038-350, Londrina, Paraná, Brazil.

\*Author to whom correspondence should be addressed: Waldiceu A. Verri Jr. Departamento de Ciências Patológicas, Universidade Estadual de Londrina-UEL, Rod. Celso Garcia Cid, Km 380, PR445, 86057-970, Cx. Postal 10.011, Londrina, Paraná, Brazil. Fax: + 55 43 33714387, Tel: + 55 43 33714979, E-mail address: waldiceujr@yahoo.com.br; wavverri@uel.br.

## Supplementary Figures

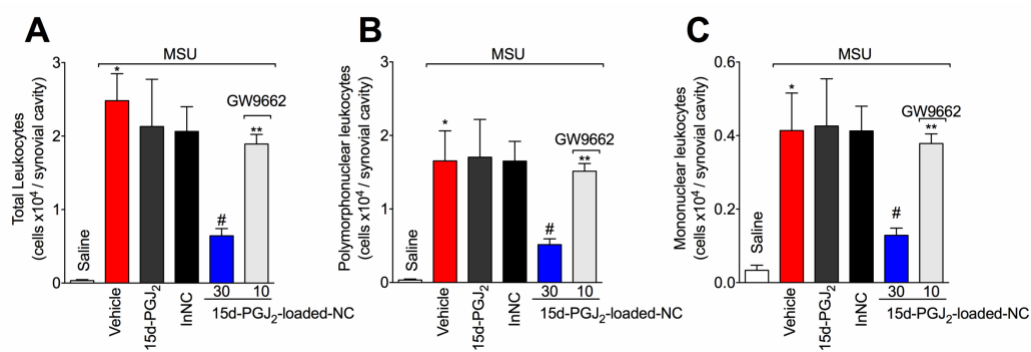

**Supplementary Figure 1 (SF1). 15d-PGJ<sub>2</sub>-loaded NC reduce MSU-induced leukocyte recruitment 7h post-stimulus in a PPAR- $\gamma$ -sensitive manner.** Seven hours after MSU stimulus, the number of total leukocytes (**A**), neutrophils (**B**) and mononuclear cells (**C**) were determined. Results are expressed as mean  $\pm$  SEM, n = 6, two independent experiments (\*p < 0.05 vs. control group; #p < 0.05 vs. vehicle mg/kg group, \*\*p < 0.05 vs 15d-PGJ<sub>2</sub>-loaded NC).

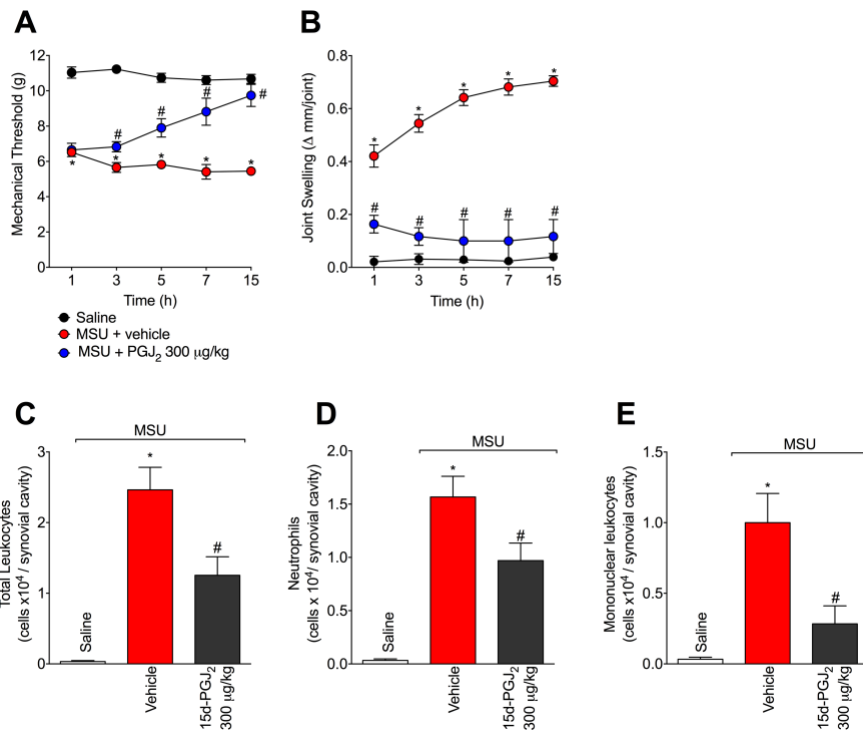

**Supplementary Figure 2 (SF2). Higher dose of non-encapsulated 15d-PGJ<sub>2</sub> inhibits MSU-induced mechanical hyperalgesia and joint swelling.** Mice were treated with 15d-PGJ<sub>2</sub> (300 μg/kg) or vehicle 30 minutes before MSU (100 μg/10 μl/knee) stimulus in the femur-tibial joint of mice. Mechanical hyperalgesia (A) and joint swelling (B) were evaluated 1, 3, 5, 7, and 15h after MSU injection and 15h after MSU injection knee joints were collected to determine total leukocytes (C), neutrophil (D) and mononuclear cell counts using Neubauer chamber and stained slices (\*p < 0.05 vs. control group; #p < 0.05 vs. vehicle group two-way ANOVA followed by Tukey's post-test).

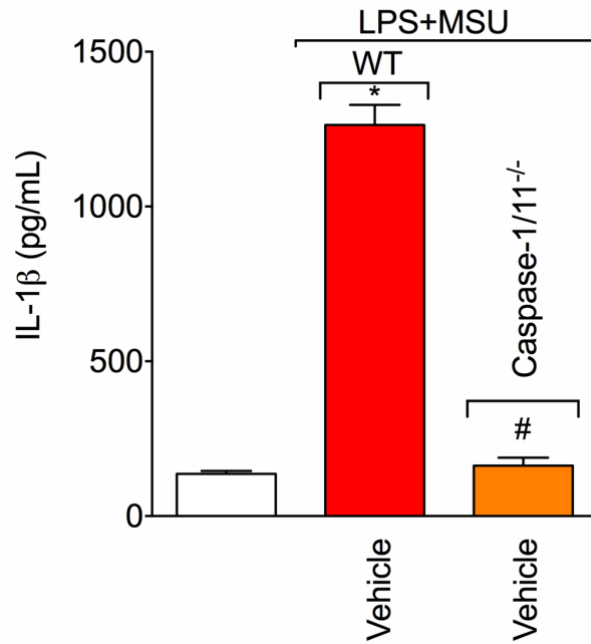

**Supplementary Figure 3 (SF3). MSU-induced IL-1 $\beta$  maturation *in vitro* depends on caspase-1.** IL-1 $\beta$  concentration (ELISA) in WT and caspase-1/11<sup>-/-</sup> BMDM culture supernatants primed with LPS (500 ng/ml, *i.e.* signal 1) for 3h and stimulated with MSU (450  $\mu$ g/ml, *i.e.* signal 2) followed by 5h incubation. Results are expressed as mean  $\pm$  SEM, n = 6 wells per group per experiment, two independent experiments (\*p < 0.05 vs. control group; #p < 0.05 vs. WT vehicle group, one-way ANOVA followed by Tukey's post-test).
